# Supplementary material
Source: PubMed Central journal article supplement (PMC6456629)
Supplement: 13205_2019_1688_MOESM1_ESM.pdf [file 13205_2019_1688_MOESM1_ESM.pdf]

## Supplement figures

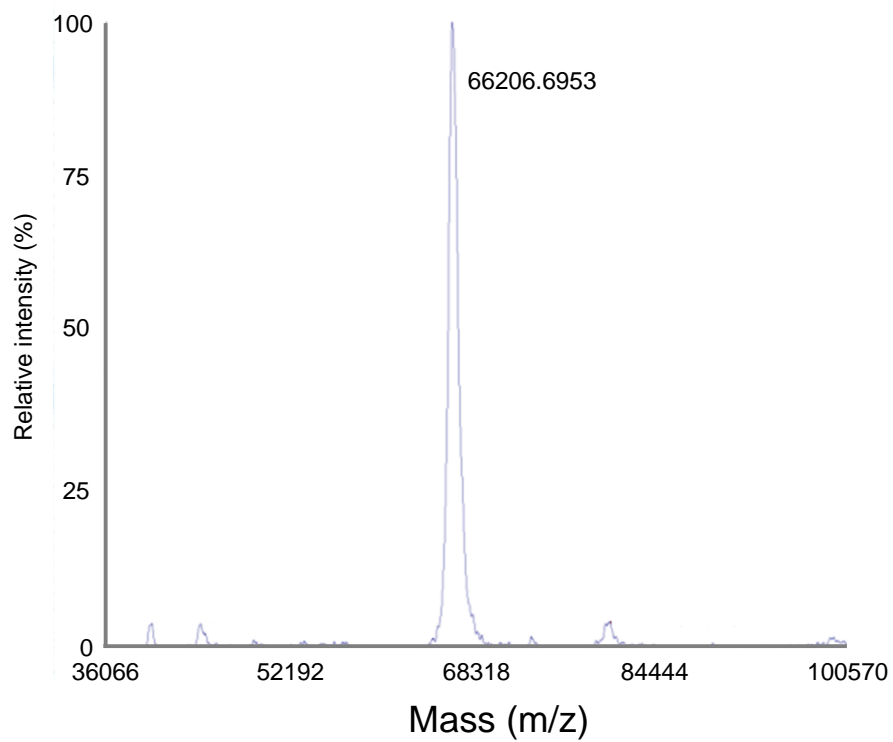

**Fig S1.** The Mw of the de-glycosylated MiLacA, as estimated by MALDI-TOF/MS analysis.

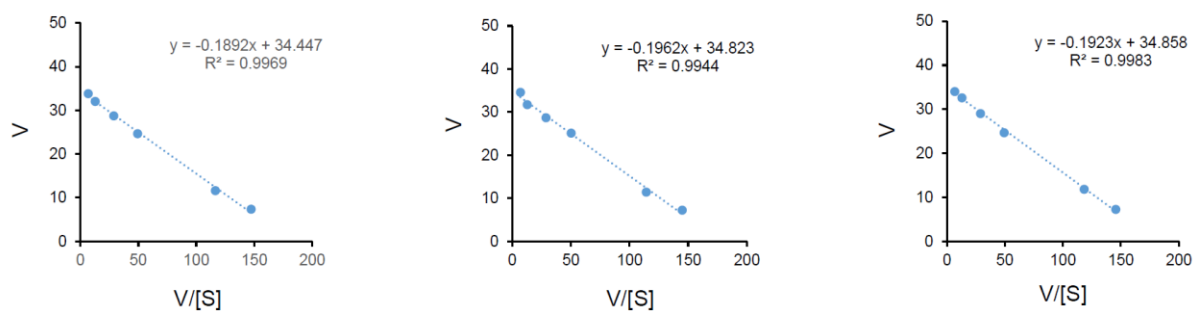

**Fig S2.** Kinetic parameters determined with Eadie-Hofstee plots.
